1 **Novel *Rickettsia* spp. in two common overwintering North American passerines**

2

3 Daniel J. Becker<sup>1\*</sup>, Allison Byrd<sup>2,3</sup>, Tara M. Smiley<sup>3,4</sup>, Mariana Fernandes Marques<sup>5</sup>, Julissa  
4 Villegas Nunez<sup>5</sup>, Katherine M. Talbott<sup>2</sup>, Jonathan W. Atwell<sup>2</sup>, Dmitriy V. Volokhov<sup>6</sup>, Ellen D.  
5 Ketterson<sup>2,3</sup>, Alex E. Jahn<sup>2,3</sup>, Kerry L. Clark<sup>5</sup>

6

7 <sup>1</sup> Department of Biology, University of Oklahoma, Norman, OK, USA

8 <sup>2</sup> Department of Biology, Indiana University, Bloomington, IN, USA

9 <sup>3</sup> Environmental Resilience Institute, Indiana University, Bloomington, IN, USA

10 <sup>4</sup> Department of Ecology & Evolution, Stony Brook University, Stony Brook, NY USA

11 <sup>5</sup> Department of Public Health, University of North Florida, Jacksonville, FL, USA

12 <sup>6</sup> Center for Biologics Evaluation and Research, U.S. Food and Drug Administration, Silver

13 Spring, MD, USA

14 \*[danbeck@ou.edu](mailto:danbeck@ou.edu), corresponding author

15

16 **Keywords:** American robin; dark-eyed junco; rickettsiae; *Borrelia*; *Bartonella*; hemoplasmas;  
17 migration; arthropod-borne disease; stable isotopes

18

19 **Running head:** Novel rickettsiae in migratory songbirds

20

21 **Abstract**

22

23 American robins and dark-eyed juncos migrate across North America, but their contributions to  
24 arthropod-borne disease remain poorly characterized. We identified novel *Rickettsia* spp. in one  
25 wintering migrant per bird species related to bellii, transitional, and spotted fever group  
26 rickettsiae and suggest spring migration could disperse these pathogens hundreds-to-  
27 thousands of kilometers.

28 **Main text**

29

30 Migratory birds play an important role in shaping risks of arthropod-borne diseases, given their  
31 ability to disperse pathogens and vectors to new wintering or breeding locations. For pathogens  
32 with high public health burdens, such as *Borrelia burgdorferi* and spotted fever group (SFG)  
33 rickettsiae, migratory birds can disperse millions of infected vectors annually (1). Many  
34 migratory birds are also competent for these pathogens and therefore can not only disperse  
35 pathogens and arthropods but also transmit infections to naïve vectors following migration (2).

36

37 American robins (*Turdus migratorius*) and dark-eyed juncos (*Junco hyemalis*) are important  
38 species to understand bird migration and arthropod-borne disease in North America. They are  
39 competent for some pathogens and can have high ectoparasite intensities (2,3). Both have  
40 diverse migratory behaviors, are widely distributed, and are common in suburban habitats (4,5),  
41 which could facilitate pathogen dispersal to areas of high human exposure. Yet the contribution  
42 of these common migratory bird species to arthropod-borne disease remains poorly understood.

43

44 Here, we sampled robins and juncos across North America for arthropod-borne pathogens of  
45 public health significance. We focused on bacterial pathogens for which these birds are known  
46 to be competent (*Borrelia* spp.) (2), for which detections have occurred in other passerines  
47 (*Rickettsia* spp.) (6), and that are rarely or never seen in birds (*Bartonella* spp., hemoplasmas).

48

49 Robins were sampled monthly in southern Indiana (2020–2021), while juncos were sampled in  
50 southern California (2006), Virginia’s Appalachian Mountains (2018, 2019), and northeastern  
51 Ohio (2019). California and Ohio were sampled in the breeding season, while Virginia was  
52 sampled in winter (7). We captured birds with mist nets, applied USGS bands, and collected  
53 blood stored in 96% ethanol or Longmire’s buffer at –20°C, on Whatman FTA cards, or frozen  
54 directly at –20°C. We also collected the first secondary feather for stable isotope analyses.  
55 Sampling was approved by the Indiana University IACUC (06-242, 18-028), Federal Bird  
56 Banding Permit 20261, and state permits. Table 1 shows sample sizes per site and month.

57

58 DNA was extracted from blood with Maxwell RSC Whole Blood DNA kits or Qiagen DNeasy 96  
59 Blood and Tissue kits. We then used published PCR protocols to screen avian DNA for  
60 *Bartonella* spp. (partial *gltA* gene), *Borrelia* spp. (partial 16S rRNA gene), and *Rickettsia* spp.  
61 (23S-5S rRNA intergenic spacer [ITS]). A subset of robins was also tested for hemoplasmas  
62 (partial 16S rRNA gene). Table S1 provides PCR primers and thermocycler conditions.

63

64 Of 675 samples, we detected rickettsiae in one robin (0.26%, 1/391) and one junco (0.35%,  
65 1/284), representing the first reports of rickettsiae in these bird species. No other target  
66 pathogens were detected (Table 1). Both sequences (GenBank accessions ON773823 and  
67 ON773824) shared only 82.61% partial identity of the 23S and 5S rRNA flanking sequences of  
68 their ITS to one another, indicating distinct rickettsiae. We used NCBI BLASTn to identify related  
69 rickettsiae 23S-5S rRNA ITS and type strain sequences, followed by MUSCLE for alignment  
70 and MrBayes for phylogenetics (10,000,000 generations, GTR+G+I) via NGPhylogeny.fr (8).

71

72 Both sequences had ≤91% identity to other *Rickettsia* spp. The robin sequence was related  
73 (83.85–91.01% identity with 91% sequence coverage) to uncultured rickettsiae from *Ixodes*  
74 *auritulus* in Argentina (MW824654), *Amblyomma americanum* and *Ixodes scapularis* in the USA  
75 (KJ796407 and KJ796403), humans in Ethiopia (MK693112) and India (OK077732–OK077742),  
76 and to *R. monacensis* (e.g., JQ796867), *R. tillamookensis* (CP060138), and *R. felis* (e.g.,  
77 DQ139799). The junco sequence was only partially related (87.63–88.66% identity with 49%

78 sequence coverage) to the above sequences, and the main internal part (146 bp) of this ITS  
79 sequence (without 23S and 5S rRNA flanking sequences) was unique with no identity to any  
80 rickettsiae ITS sequences in GenBank. These sequences thus belong to two novel but not yet  
81 cultured *Rickettsia* spp., and our 23S-5S ITS phylogeny suggested they are most similar to  
82 rickettsiae within the bellii group (BG), transitional group (TRG), and SFG (9) (Fig. 1A).

83  
84 *Rickettsia*-positive robins and juncos were sampled in winter (12/2020 and 11/2018). Most  
85 robins wintering in Indiana remain year-round or migrate elsewhere to breed, while wintering  
86 juncos in the Appalachians include migrant and resident subspecies; we earlier determined this  
87 positive bird as migratory (*J. h. hyemalis*) (7). Using feather hydrogen isotopes and geographic  
88 assignment (Figure S1) (10), we estimated the most likely breeding site of the robin to be the  
89 Great Lakes (e.g., Wisconsin; 459 km median migration distance), whereas that of the junco  
90 ranged from the western USA to Manitoba in Canada (2,377 km median migration distance; Fig.  
91 1B). Positive birds were thus short- or long-distance migrants and could spread their novel  
92 rickettsiae during spring migration. Further study of rickettsiae in these common birds will be  
93 important to characterize their evolutionary history, whether passerines are competent hosts,  
94 and dispersal potential in relation to bird migration.

### 95 96 **Acknowledgements**

97 This work was supported in part by the Prepared for Environmental Change Grand Challenge  
98 Initiative at Indiana University, the Intelligence Community Postdoctoral Research Fellowship  
99 Program, the Virginia Society of Ornithology, the National Science Foundation (DEB-0808284,  
100 IOS-0820055, DBI-0939454), and the National Institutes of Health (T32 HD49336). We thank  
101 Janice Dispoto and Jason Weckstein for assistance with DNA extraction at Drexel University.

102 **Table 1.** Sample sizes for robins and juncos per month, year, and region. All samples were  
 103 tested for *Borrelia* spp, *Rickettsia* spp., and *Bartonella* spp.; parentheses indicate samples  
 104 tested for hemoplasmas. Asterisks indicate the single *Rickettsia*-positive per bird species.  
 105

| Avian host                | Date    | Region                | Number sampled |
|---------------------------|---------|-----------------------|----------------|
| <i>Turdus migratorius</i> | 1/2020  | Southern Indiana      | 21 (8)         |
| <i>Turdus migratorius</i> | 2/2020  | Southern Indiana      | 15 (8)         |
| <i>Turdus migratorius</i> | 3/2020  | Southern Indiana      | 77 (41)        |
| <i>Turdus migratorius</i> | 4/2020  | Southern Indiana      | 67 (32)        |
| <i>Turdus migratorius</i> | 5/2020  | Southern Indiana      | 8 (7)          |
| <i>Turdus migratorius</i> | 9/2020  | Southern Indiana      | 18             |
| <i>Turdus migratorius</i> | 10/2020 | Southern Indiana      | 20             |
| <i>Turdus migratorius</i> | 11/2020 | Southern Indiana      | 25             |
| <i>Turdus migratorius</i> | 12/2020 | Southern Indiana      | 24*            |
| <i>Turdus migratorius</i> | 1/2021  | Southern Indiana      | 21             |
| <i>Turdus migratorius</i> | 2/2022  | Southern Indiana      | 1              |
| <i>Turdus migratorius</i> | 3/2022  | Southern Indiana      | 18             |
| <i>Turdus migratorius</i> | 4/2022  | Southern Indiana      | 37             |
| <i>Turdus migratorius</i> | 7/2021  | Southern Indiana      | 5              |
| <i>Turdus migratorius</i> | 9/2021  | Southern Indiana      | 28             |
| <i>Turdus migratorius</i> | 10/2021 | Southern Indiana      | 6              |
| <i>Junco hyemalis</i>     | 2/2006  | Southern California   | 25             |
| <i>Junco hyemalis</i>     | 3/2006  | Southern California   | 54             |
| <i>Junco hyemalis</i>     | 4/2006  | Southern California   | 32             |
| <i>Junco hyemalis</i>     | 5/2006  | Southern California   | 25             |
| <i>Junco hyemalis</i>     | 6/2006  | Southern California   | 24             |
| <i>Junco hyemalis</i>     | 7/2006  | Southern California   | 9              |
| <i>Junco hyemalis</i>     | 7/2019  | Northeastern Ohio     | 20             |
| <i>Junco hyemalis</i>     | 11/2018 | Appalachian Mountains | 65*            |
| <i>Junco hyemalis</i>     | 11/2019 | Appalachian Mountains | 30             |

106 **Figure 1.** (A) Bayesian phylogeny of the novel *Rickettsia* spp. with closely related and reference  
 107 rickettsiae sequences from GenBank, including those in the bellii group (BG), typhus group  
 108 (TG), transitional group (TRG), and spotted fever group (SRG). Nodes are colored by posterior  
 109 probability. (B) Field sites relative to the American robin and dark-eyed junco distribution with  
 110 the estimated breeding origins of the two PCR-positive birds. Geographic assignments were  
 111 performed using feather hydrogen of previously established known-origin juncos, robins, and  
 112 other passerines (Fig. S1). Paths display median migration distance, defined as kilometers  
 113 between winter capture site and median coordinates in the 90% probability breeding ground.  
 114

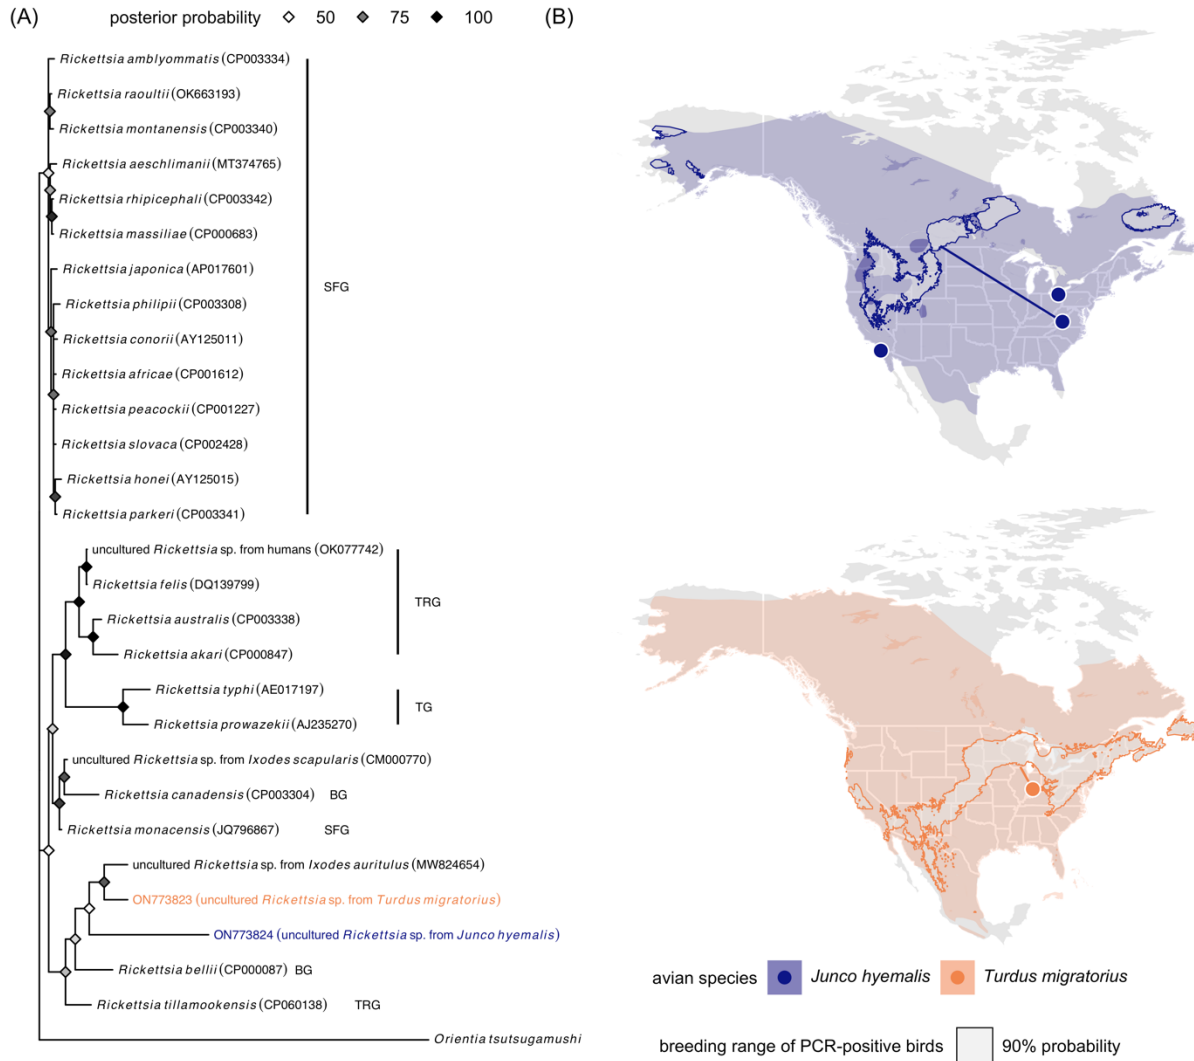

115

116 **References**

- 117 1. Cohen EB, Auckland LD, Marra PP, Hamer SA. Avian migrants facilitate invasions of  
118 neotropical ticks and tick-borne pathogens into the United States. *Appl Environ Microbiol.*  
119 2015 Dec;81(24):8366–78.
- 120 2. Becker DJ, Han BA. The macroecology and evolution of avian competence for *Borrelia*  
121 *burgdorferi*. *Glob Ecol Biogeogr.* 2021 Mar;30(3):710–24.
- 122 3. Scott JD, Anderson JF, Durden LA. Widespread dispersal of *Borrelia burgdorferi*-infected  
123 ticks collected from songbirds across Canada. *J Parasitol.* 2012 Feb 1;98(1):49–59.
- 124 4. Jahn AE, Lerman SB, Phillips LM. First tracking of individual American robins (*Turdus*  
125 *migratorius*) across seasons. *Wilson J Ornithol.* 2019.
- 126 5. Ketterson ED, Atwell JW. *Snowbird: Integrative Biology and Evolutionary Diversity in the*  
127 *Junco*. University of Chicago Press; 2016.
- 128 6. Hornok S, Kováts D, Csörgő T, Meli ML, Gönczi E, Hadnagy Z, et al. Birds as potential  
129 reservoirs of tick-borne pathogens: first evidence of bacteraemia with *Rickettsia helvetica*.  
130 *Parasit Vectors.* 2014 Mar 28;7:128.
- 131 7. Becker DJ, Talbott KM, Smiley TM, Clark KL, Sauer PE, Ketterson ED. Leukocyte profiles  
132 vary with breeding latitude and infection status in a seasonally sympatric songbird. *Animal*  
133 *Migration.* 2019 Jan 1;6(1):28–40.
- 134 8. Lemoine F, Correia D, Lefort V, Doppelt-Azeroual O, Mareuil F, Cohen-Boulakia S, et al.  
135 NGPhylogeny.fr: new generation phylogenetic services for non-specialists. *Nucleic Acids*  
136 *Res.* 2019 Jul 2;47(W1):W260–5.
- 137 9. Merhej V, Raoult D. Rickettsial evolution in the light of comparative genomics. *Biol Rev.*  
138 2011 May;86(2):379–405.
- 139 10. Wanamaker SM, Singh D, Byrd AJ, Smiley TM, Ketterson ED. Local adaptation from afar:  
140 migratory bird populations diverge in the initiation of reproductive timing while wintering in  
141 sympatry. *Biol Lett.* 2020 Oct;16(10):20200493.
